# Supplementary material for: Hydrogen peroxide sensitive hemoglobin-capped gold nanoclusters as a fluorescence enhancing sensor for the label-free detection of glucose
Source: Royal Society of Chemistry journal article supplement (doi:10.1039/c5ra00335k), 2015-01-01
Supplement: c5ra00335k1.pdf [file c5ra00335k1.pdf]

# Hydrogen peroxide sensitive hemoglobin-capped gold nanoclusters as a turn-on fluorescent sensor for the label-free detection of glucose

Fatemeh Molaabasi,<sup>a</sup> Saman Hosseinkhani,<sup>b</sup> and Mojtaba Shamsipur,<sup>\*c</sup>

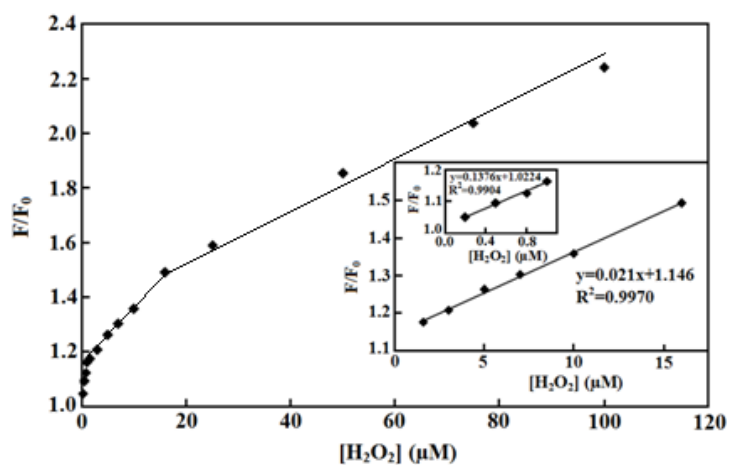

**Fig. S1.** Plot of fluorescence ratio ( $F/F_0$ ) of the fluorescent Hb-AuNCs probe at 450 nm for different concentrations of  $H_2O_2$  at 67 °C. Inset shows the two linear graphs from 0.2 to 1.0  $\mu M$  ( $R^2=0.990$ ) and from 1.6 to 16  $\mu M$  ( $R^2=0.997$ ) with a detection limit 0.04  $\mu M$ ;  $[Hb-AuNCs] = 2.2 \mu M$ .

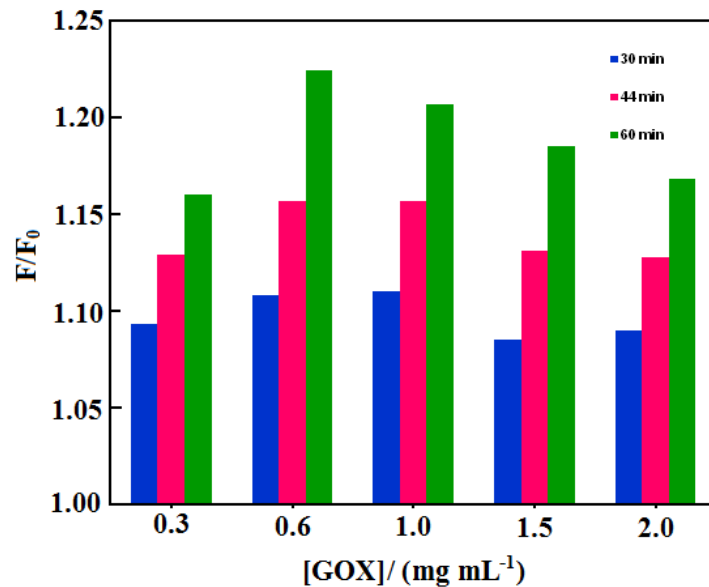

**Fig. S2.** Effect of concentration of GOx at different incubation time on the fluorescence enhancement of Hb-AuNCs in the presence glucose at 450 nm ( $\lambda_{\text{ex}}=365$  nm) in 10 mM PBS buffered to pH 7.4; [glucose] = 1 mM and [Hb-Au NCs] = 2.2  $\mu\text{M}$ .

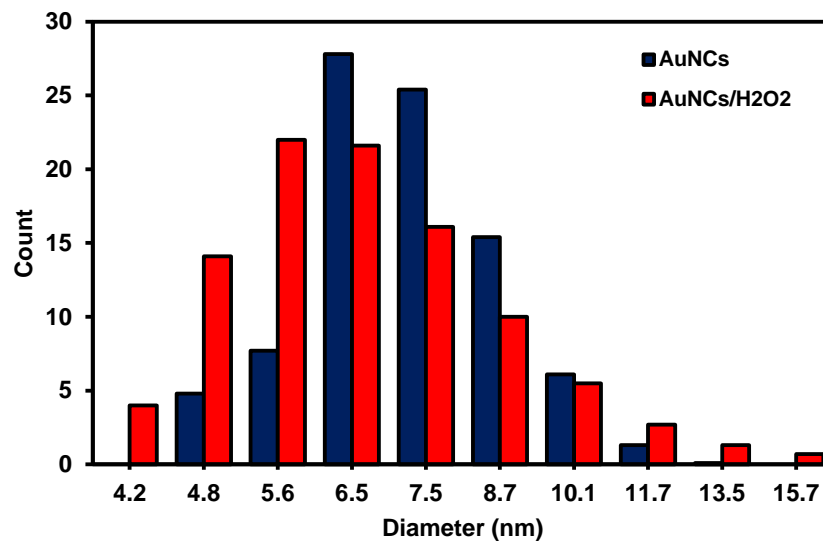

**Figure S3.** Histograms of particle-size distribution for the gold nanoclusters in the absence (blue) and presence of 1 mM H<sub>2</sub>O<sub>2</sub> (red).

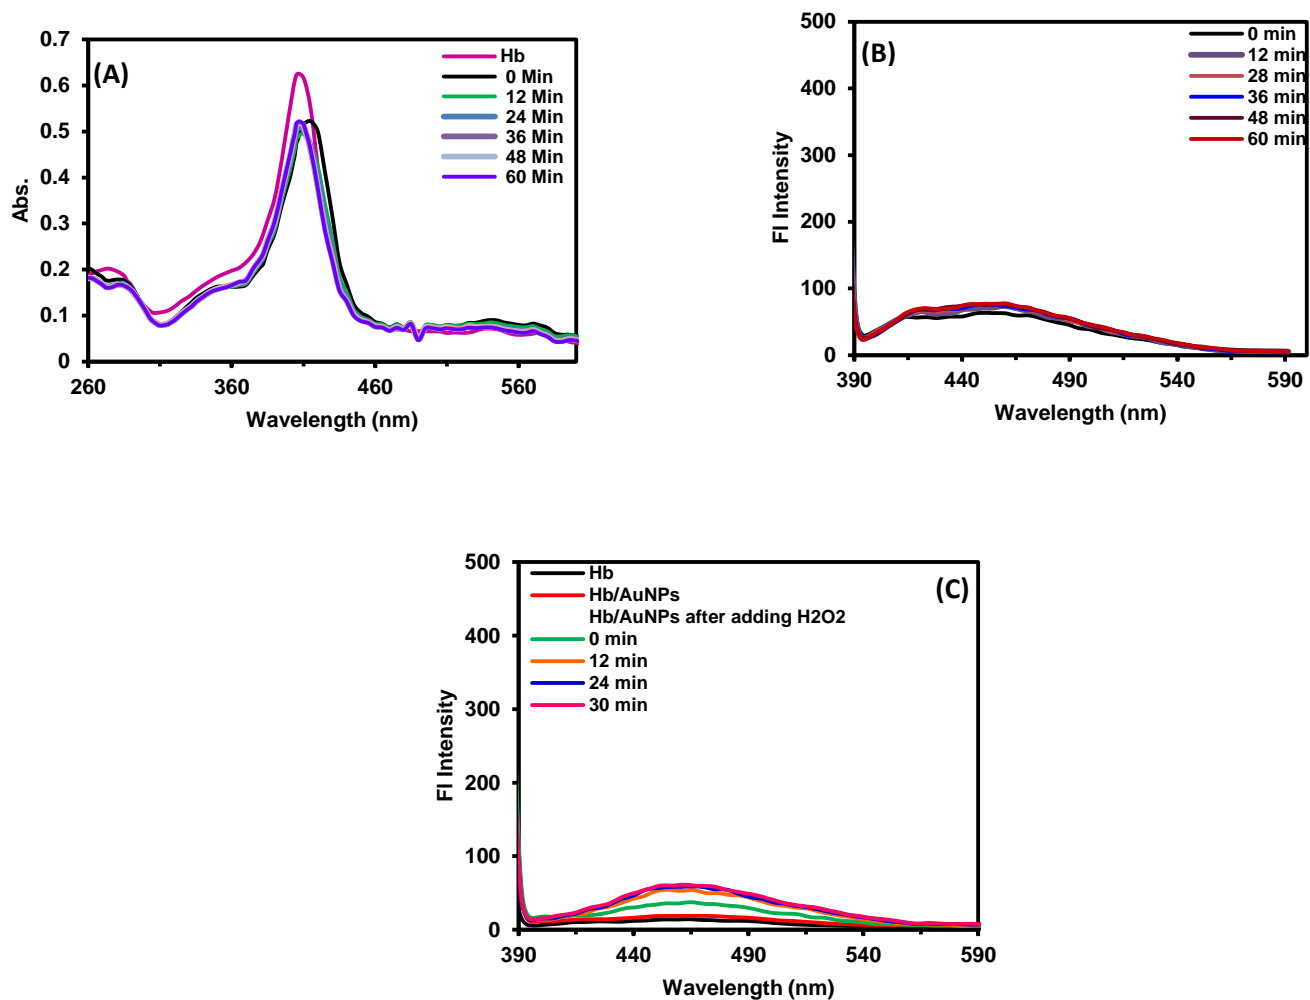

**Fig. S4.** (A) Absorption and (B) fluorescence spectral changes ( $\lambda_{\text{ex}} = 365 \text{ nm}$ ) of Hb upon addition of  $\text{H}_2\text{O}_2$  as a function of irradiation time (C) The fluorescence spectra of Hb in the presence of AuNPs ( $\sim 10 \text{ nm}$ ) and in the presence of both AuNPs and  $\text{H}_2\text{O}_2$ ;  $[\text{H}_2\text{O}_2] = 1 \text{ mM}$  and  $[\text{Hb}] = 2.2 \mu\text{M}$ .
